# Supplementary material for: Herbal Medicine Practices of Patients With Liver Cancer in Peru: A Comprehensive Study Toward Integrative Cancer Management
Source: PubMed Central journal article supplement — Integr Cancer Ther. 2016 Dec 8;17(1):52–64. doi: 10.1177/1534735416681642 (PMC5950939; doi:10.1177/1534735416681642), 2016-12-08
Supplement: Supplemental_Document_S1.pdf [file Supplemental_Document_S1.pdf]

## Cuestionario epidemiológico – Llenado por el paciente

**Recomendación general para completar el cuestionario: por favor, escribir en MAYUSCULA**

### 1 – DATOS DE LA INVESTIGATION

**1.1.1. Fecha en la que se completa el cuestionario (día/mes/año):**

**1.1.2. Hora de inicio de entrevista:**

**1.2. Lugar en el que se completa el cuestionario (Instituto u otro):**

**1.3. Persona que llenó el cuestionario:**

| Paciente | Familiar | Médico | Otro |
|----------|----------|--------|------|
|          |          |        |      |

### 2 – DATOS PERSONALES

Nombres:

Apellidos:

Numero INEN del paciente:

Fecha de nacimiento (día/mes/año):

Edad:            años                      Sexo:            Hombre ☐    Mujer ☐

Lugar de nacimiento (Departamento/Provincia/Ciudad):

Idioma natal ó etnia:

Teléfono ó teléfono celular:

Dirección actual:

Actividad laboral actual:

*Por los chicos, si es posible, cuál fue el peso de nacimiento:*

### 2.1. Estado civil

Marcar con una X el que corresponda

|             |  |
|-------------|--|
| Soltero(a)  |  |
| Conviviente |  |
| Casado(a)   |  |
| Divorcio(a) |  |
| Viudo(a)    |  |

### 2.2. Nivel de educación:

Marcar con una X el que corresponda

|                     |  |
|---------------------|--|
| Analfabeto(a)       |  |
| Primaria            |  |
| Secundaria          |  |
| Estudios superiores |  |
| Técnica             |  |

### 2.3.1. ¿Tiene hijos?

Marcar con una X el que corresponda

|    |  |
|----|--|
| SI |  |
| NO |  |

### 2.3.2. Si tiene hijos, ¿cuántos?

|               |  |
|---------------|--|
| Cuántos hijos |  |
| Cuántas hijas |  |

### 2.4.1. ¿Cuál es su ingreso mensual?

Marcar con una X el que corresponda

|                        |  |
|------------------------|--|
| Menos de 300 soles     |  |
| Entre 300 y 600 soles  |  |
| Entre 600 y 1500 soles |  |
| Más de 1500 soles      |  |
| Más de 5000 soles      |  |

### 2.4.2. ¿Cuál es el ingreso mensual de su familia?

Marcar con una X el que corresponda

|                        |  |
|------------------------|--|
| Menos de 300 soles     |  |
| Entre 300 y 600 soles  |  |
| Entre 600 y 1500 soles |  |
| Más de 1500 soles      |  |
| Más de 5000 soles      |  |

## 3 – ENTORNO DE VIDA

### 3.1.1. Menciona sus actividades laborales desempeñadas anteriormente (hace un año ó más):

| Tipo de actividad laboral | Tiempo (en años) |
|---------------------------|------------------|
| Trabajo actual:           |                  |
|                           |                  |
|                           |                  |
|                           |                  |

### 3.1.2. Menciona las actividades laborales (actuales o desempeñadas) de:

| PADRE | MADRE | ESPOSO/ESPOSA |
|-------|-------|---------------|
|       |       |               |

### 3.2.1. Tipo de lugar donde vive:

Marcar con una X el que corresponda

|                     |  |
|---------------------|--|
| Ciudad              |  |
| Campo               |  |
| Asentamiento humano |  |
| Otro                |  |

Si es otro, especificar cual:

### 3.2.2. Estructura de vivienda actual:

Marcar con una X el que corresponda

|                      |  |
|----------------------|--|
| Vivienda de esteras  |  |
| Vivienda de albergue |  |
| Vivienda de concreto |  |
| Otro                 |  |

Si es otro, especificar cual:

### 3.2.4. ¿Hace cuánto tiempo vive a la dirección actual?

Marcar con una X el que corresponda

|                        |  |
|------------------------|--|
| 1 año o menos          |  |
| Entre 1 año y 2 años   |  |
| Entre 2 años y 4 años  |  |
| Entre 4 años y 6 años  |  |
| Entre 6 años y 10 años |  |
| Más de 10 años         |  |

### 3.2.3. Tipo de vivienda actual:

Marcar con una X el que corresponda

|                 |  |
|-----------------|--|
| Sin hogar       |  |
| Departamento    |  |
| Casa            |  |
| Asilo           |  |
| Orfanato        |  |
| Albergue social |  |
| Otro            |  |

Si es otro, especificar cual:

### 3.2.5. ¿Con quién(es) vive? (Puede marcar más de uno)

Marcar con una X los que correspondan

|                          |  |
|--------------------------|--|
| Padres                   |  |
| Hermano(a)(s)            |  |
| Esposo(a) o conviviente  |  |
| Hijos                    |  |
| Solo(a)                  |  |
| Con campaneros de cuarto |  |
| Otro                     |  |

Si es otro, especificar:

### 3.2.6. Si usted ha vivido en diferentes direcciones en los últimos 15 años, especifique en qué lugares y cuánto tiempo:

| Ciudad | Departamento | Provincia | Tiempo (en años) |
|--------|--------------|-----------|------------------|
|        |              |           |                  |
|        |              |           |                  |
|        |              |           |                  |
|        |              |           |                  |

**3.2.7. Especificar los tipos de empresas o actividades principales o de importancia en su provincia (por ejemplos, minas, puertos, agrícolas, textiles,...):**

| Año | Tiempo | Tipos de actividades |
|-----|--------|----------------------|
|     |        |                      |
|     |        |                      |
|     |        |                      |
|     |        |                      |

**3.2.8. ¿Cuál es el lugar de origen de su familia?**

| Parentesco | Departamento | Provincia | Distrito |
|------------|--------------|-----------|----------|
|            |              |           |          |
|            |              |           |          |
|            |              |           |          |
|            |              |           |          |

**3.3.1. ¿Tiene animales?**

Marcar con una X el que corresponda, Si la respuesta es NO pasar a la pregunta 4.1.1.

|    |  |
|----|--|
| SI |  |
| NO |  |

**3.3.2. Si la respuesta es sí, que tipo de animales (puede marcar más de uno):**

Marcar con una X el que corresponda

|                                              |  |
|----------------------------------------------|--|
| Mascotas (perros, gatos, aves ...)           |  |
| Ganado (vacas, cerdos , ovejas, conejos ...) |  |
| Aves de corral (pollos, patos ...)           |  |
| Otro                                         |  |

**3.3.3. Si tiene animales, por favor especificar que animales:**

|  |
|--|
|  |
|--|

## 4 – ESTILO DE VIDA

### 4.1.1. La comida que consume mayormente es: (una respuesta sola posible)

Marcar con una X el que corresponda

|                      |  |
|----------------------|--|
| Sembrada y cultivada |  |
| Fresca del mercado   |  |
| Conserva o enlatada  |  |
| No conocido          |  |

### 4.1.2. ¿Qué es lo que más consume? (puede marcar más de uno)

Marcar con una X los que correspondan

|                                        | Poco | Frecuentemente |
|----------------------------------------|------|----------------|
| Carne                                  |      |                |
| Pollo                                  |      |                |
| Pescado                                |      |                |
| Papas                                  |      |                |
| Tocosh                                 |      |                |
| Chuño                                  |      |                |
| Arroz                                  |      |                |
| Vegetales                              |      |                |
| Frutas                                 |      |                |
| Dulces                                 |      |                |
| Snack                                  |      |                |
| Otro                                   |      |                |
| Si es otro, por favor especificar que: |      |                |

### 4.2. ¿De dónde viene el agua que consume? (puede marcar más de uno)

Marcar con una X los que correspondan

|                                         | Poco | Frecuentemente |
|-----------------------------------------|------|----------------|
| Agua en botella                         |      |                |
| Agua corriente/grifo                    |      |                |
| Pozo                                    |      |                |
| Arroyo/rio                              |      |                |
| Agua de lluvia                          |      |                |
| Agua de cisterna                        |      |                |
| No conocido                             |      |                |
| Otro                                    |      |                |
| Si es otro, por favor especificar que : |      |                |

**4.3.1. ¿Recibe tratamiento actualmente para alguna enfermedad?**

Marcar con una X el que corresponda

|    |  |
|----|--|
| SI |  |
| NO |  |

**4.3.2. ¿Ha recibido tratamiento continuo para alguna enfermedad?**

Marcar con una X el que corresponda

|    |  |
|----|--|
| SI |  |
| NO |  |

**4.3.3. ¿Para cuales enfermedades ha recibo ó recibe tratamientos continuos? Especifica los nombres de los tratamientos si puede.**

| Nombre de las enfermedades | Nombre de los tratamientos |
|----------------------------|----------------------------|
|                            |                            |
|                            |                            |
|                            |                            |

**4.4.1. ¿Realiza regularmente actividad física?**

Marcar con una X el que corresponda  
Si la respuesta es NO pasar a la pregunta 4.5.1.

|    |  |
|----|--|
| SI |  |
| NO |  |

**4.4.2. Si realiza actividad física, ¿Con que frecuencia?**

Marcar con una X el que corresponda

|              |  |
|--------------|--|
| Diario       |  |
| Interdiario  |  |
| Semanalmente |  |
| Mensualmente |  |

**4.5.1. ¿Fuma?**

Marcar con una X el que corresponda  
Si la respuesta es NO pasar a la pregunta 4.6.1.

|    |  |
|----|--|
| SI |  |
| NO |  |

**4.5.2. ¿Ha fumado antes?**

Marcar con una X el que corresponda

|    |  |
|----|--|
| SI |  |
| NO |  |

**4.5.3. Si fuma o ha fumado, ¿qué?**

Marcar con una X el que corresponda

|                  |  |
|------------------|--|
| Cigarros         |  |
| Puros            |  |
| Cigarros y puros |  |
| Otro             |  |

**4.5.4. Si fuma o ha fumado, ¿por cuánto tiempo?**

Marcar con una X el que corresponda

|                   |  |
|-------------------|--|
| Menos de 2 años   |  |
| Entre 2 y 5 años  |  |
| Entre 5 y 10 años |  |
| Más de 10 años    |  |

#### 4.5.5. Si fuma o ha fumado, ¿Cuánto?

Marcar con una X el que corresponda

|                                               |  |
|-----------------------------------------------|--|
| Entre 1 y 5 cigarros por día                  |  |
| Entre 5 y 10 cigarros por día                 |  |
| Entre 10 y 25 cigarros (o un paquete) por día |  |
| Más de 25 cigarros (o un paquete) por día     |  |

#### 4.5.6. Si fuma o ha fumado, ¿A qué edad empezó a fumar?

|            |
|------------|
| ..... años |
|------------|

#### 4.5.7. Si ha fumado, ¿A qué edad dejó a fumar?

|            |
|------------|
| ..... años |
|------------|

#### 4.6.1. ¿Con que frecuencia toma alcohol?

Marcar con una X el que corresponda

|                 |  |
|-----------------|--|
| Nunca           |  |
| Diario          |  |
| Interdiario     |  |
| Fin de semana   |  |
| Antiguo bebedor |  |

Si antiguo bebedor, desde cuántos años no toma:

#### 4.6.2. Si toma o ha tomado ¿Qué cantidad toma por día?

Marcar con una X el que corresponda

|                  |  |
|------------------|--|
| Menos de un vaso |  |
| Un vaso          |  |
| 2 vasos          |  |
| Más de 2 vasos   |  |

Si es más de 2 vasos, por favor especificar qué cantidad:

#### 4.6.3. Si toma o ha tomado, ¿Qué tipo de alcohol toma usted frecuente? (puede marcar más de uno)

Marcar con una X los que correspondan

|                                          |  |
|------------------------------------------|--|
| Vino                                     |  |
| Cerveza                                  |  |
| Chicha de jora                           |  |
| Aguardiente peruano (Pisco, Ron, Cañazo) |  |
| Aguardiente(Whisk y, Vodka)              |  |
| Otro                                     |  |

Si es otro, por favor especificar cuál:

#### 4.6.4. Si toma o ha tomado, ¿por cuánto tiempo ha tomado?

Marcar con una X el que corresponda

|                   |  |
|-------------------|--|
| Menos de 3 años   |  |
| Entre 3 y 5 años  |  |
| Entre 5 y 10 años |  |
| Más de 10 años    |  |

**4.6.5. Si toma, ¿A qué edad empezó a tomar? ¿A qué edad dejó a tomar?**

|                        |
|------------------------|
| ..... años y .....años |
|------------------------|

**4.7.1. ¿Consume drogas?**

Marcar con una X el que corresponda

|    |  |
|----|--|
| SI |  |
| NO |  |

**4.7.2. ¿Ha consumido drogas?**

Marcar con una X el que corresponda

|    |  |
|----|--|
| SI |  |
| NO |  |

Si las respuestas a las preguntas 4.7.1. y 4.7.2. son NO pasar a la pregunta 4.8.1

**4.7.3. Si consume o ha consumido drogas, ¿cuáles son? (puede marcar más de uno)**

Marcar con una X los que correspondan

|                      |  |
|----------------------|--|
| Marihuana (Cannabis) |  |
| Cocaína              |  |
| Heroína              |  |
| Anfetamina           |  |
| Acido (como LSD)     |  |
| Otro                 |  |

Si otro, especificar cuál:

**4.7.4. Si consume o ha consumido drogas, ¿Cuál es la vía de consumo? (puede marcar más de uno)**

Marcar con una X los que correspondan

|                        |  |
|------------------------|--|
| Por la boca            |  |
| Por la nariz           |  |
| Por inyección (o piel) |  |
| Por fumar              |  |
| Otro                   |  |

Si es otro, especificar cuál:

**4.7.5. Si consume o a consumido drogas, ¿Hace cuantos años o por cuantos años consumió drogas?**

|            |
|------------|
| ..... años |
|------------|

**4.8.1. ¿Utiliza usted o su familia pesticidas en casa?**

Marcar con una X el que corresponda

|    |  |
|----|--|
| SI |  |
| NO |  |

**4.8.2. ¿Utiliza usted o su familia fertilizantes en casa?**

Marcar con una X el que corresponda

|    |  |
|----|--|
| SI |  |
| NO |  |

**4.8.3. Si usted o su familia utiliza pesticidas o fertilizantes ¿Con que frecuencia? ¿Utiliza usted o su familia pesticidas en casa? P:**

**Pesticidas F: Fertilizantes**

Marcar con una X el que corresponda

|              |          |          |  |
|--------------|----------|----------|--|
| Nunca        | <b>P</b> | <b>F</b> |  |
| Semanalmente | <b>P</b> | <b>F</b> |  |
| Mensualmente | <b>P</b> | <b>F</b> |  |
| Anualmente   | <b>P</b> | <b>F</b> |  |
| Otro         | <b>P</b> | <b>F</b> |  |

Si es otro, precisar:

**4.8.4. Si la respuesta es si, por favor si posible nómbrelos :**

| <b>Nombres de las pesticidas</b> | <b>Nombres de los fertilizantes</b> |
|----------------------------------|-------------------------------------|
|                                  |                                     |
|                                  |                                     |
|                                  |                                     |

**4.9.1. ¿Utiliza medicina tradicional (plantas u otros) para tratar enfermedades en general?**

Marcar con una X el que corresponda

|    |  |
|----|--|
| SI |  |
| NO |  |

Si la respuesta es NO pasar a la pregunta 4.9.6.

**4.9.2. Si la respuesta es si, por favor precisar el nombre de la(s) planta(s) y de la(s) enfermedad(es) y síntomas asociados al uso:**

| <b>Nombres de las plantas</b> | <b>Enfermedades y síntomas</b> |
|-------------------------------|--------------------------------|
|                               |                                |
|                               |                                |
|                               |                                |
|                               |                                |
|                               |                                |

**4.9.3. Si la respuesta es si, para cada planta ¿cuales son las partes de planta usadas? (hoja, tallo, raíces, flores, ...):**

**4.9.4. Si la respuesta es si, precisar si la receta o la forma como consume las plantas medicinales (ejemplos: infusión, masticación, aplicación sobre la piel, baño, etc ...):**

**4.9.5. Si la respuesta es si, precisar quien ha indicado a usted el uso de esas plantas?**

**4.9.6. ¿Tomó usted algún tipo de medicina tradicional para reducir el dolor antes de venir al INEN?**

Marcar con una X el que corresponda

|    |  |
|----|--|
| SI |  |
| NO |  |

**4.9.7. Si la respuesta es si, por favor precisar el nombre de la(s) planta(s):**

| Nombres de las plantas |
|------------------------|
|                        |
|                        |
|                        |
|                        |
|                        |
|                        |

**4.9.8. Si la respuesta es si, para cada planta ¿cuales son las partes de planta usadas? (hoja, tallo, raíces, flores, ...):**

**4.9.9. Si la respuesta es si, precisar si la receta o la forma como consume las plantas medicinales (ejemplos: infusión, masticación, aplicación sobre la piel, baño, etc ...):**

**4.9.10. Si la respuesta es si, precisar quien ha indicado a usted el uso de esas plantas?**

**4.9.11. Si la respuesta es si, ¿Por cuanto tiempo ha tomado esas plantas?**

**5 – DESCRIPCION DE LA ENFERMEDAD**

**5.1.1.1. En qué parte del cuerpo Ud. siente dolor por los cuáles viene al INEN (puede marcar más de uno):**

Marcar con una X los que correspondan

|                   |  |
|-------------------|--|
| Dolor de barriga  |  |
| Dolor de espalda  |  |
| Calambre muscular |  |
| Dolor de cabeza   |  |
| Dolor al respirar |  |
| Otro dolor        |  |

Si es otro, precisar:

**5.1.1.2. Como el paciente describe sus síntomas actuales por los cuáles viene al INEN (puede marcar más de uno):**

Marcar con una X los que correspondan

|                                 |  |
|---------------------------------|--|
| Ictericia (coloración amarilla) |  |
| Nauseas                         |  |
| Vómitos                         |  |
| Garganta irritada               |  |
| Trastornos digestivos           |  |
| Embalonamiento (gas)            |  |
| Retorcijones en el estómago     |  |
| Falta de apetito                |  |
| Llenura (poco apetito)          |  |
| Baja de peso                    |  |
| Diarrea                         |  |
| Problema para dormir            |  |
| Fatiga                          |  |
| Debilidad general               |  |
| Preocupación                    |  |
| Tristeza                        |  |
| Cambio de voz                   |  |
| Otro                            |  |

Si es otro, precisar:

**5.1.1.3. Si presenta sangrado especificar (puede marcar más de uno):**

Marcar con una X los que correspondan

|       |  |
|-------|--|
| Nasal |  |
| Boca  |  |
| Orina |  |
| Otro  |  |

Si es otro, precisar:

**5.1.1.4. Si presenta cambios en la piel especificar (puede marcar más de uno):**

Marcar con una X los que correspondan

|                |  |
|----------------|--|
| Iritación      |  |
| Prurito        |  |
| Enrojecimiento |  |
| Sensibilidad   |  |
| Deshidratación |  |
| Otro           |  |

Si es otro, precisar:

**5.1.2. ¿Desde cuánto tiempo el paciente siente los síntomas (precisar días o meses o año)?**

|                       |  |
|-----------------------|--|
| <b>Dolor</b>          |  |
| <b>Otros síntomas</b> |  |

**5.2.1. ¿Tuvo algún tratamiento para tratar los síntomas antes de venir al INEN?**

Marcar con una X el que corresponda

|    |  |
|----|--|
| SI |  |
| NO |  |

Si la respuesta es NO pasar a la pregunta 5.3 (siguiente página).

**5.2.2. Si la respuesta es si, por favor precisar el nombre del tratamiento(s) :**

| Nombres de los tratamientos |
|-----------------------------|
|                             |
|                             |

**5.3. Describir brevemente el progreso medical y clínico antes de la llegada al INEN (consulta médico, clínica, hospital, etc...):**

| Mes | Año | Progreso médico |
|-----|-----|-----------------|
|     |     |                 |
|     |     |                 |
|     |     |                 |

**6 – HISTORIA MÉDICA DEL PACIENTE**

**6.1.1. Historia tumoral personal del paciente:**

Marcar con una X el que corresponda

|    |  |
|----|--|
| SI |  |
| NO |  |

Si la respuesta es NO pasar a la pregunta 6.2.1

**6.1.2. Si la respuesta es sí, por favor precisar el tipo de tumor :**

|  |
|--|
|  |
|  |

**6.1.3. Si la respuesta es sí, por favor precisar el año de diagnóstico del tumor:**

|  |
|--|
|  |
|--|

**6.1.4. Si la respuesta es sí, por favor precisar el tipo de tratamiento para el tumor: (puede marcar más de uno)**

Marcar con una X los que correspondan

|               |  |
|---------------|--|
| Cirugía       |  |
| Quimioterapia |  |
| Radioterapia  |  |
| Ningún        |  |
| Otro          |  |

Si otro, precisar:

**6.1.5. Si la respuesta es sí, por favor precisar donde se ha realizado el tratamiento:**

|  |
|--|
|  |
|--|

**6.2.1. El paciente sufre de una enfermedad crónica**

Marcar con una X el que corresponda

|    |  |
|----|--|
| SI |  |
| NO |  |

**6.2.2. Si la respuesta es sí, por favor precisar el nombre de las enfermedad(es) crónica(s) :**

|  |
|--|
|  |
|  |

**6.2.3. Si la respuesta es sí, por favor precisar el tipo de tratamiento para la(s) enfermedad(es) crónica(s):**

|  |
|--|
|  |
|  |
|  |

**6.3.1. ¿Sabe Ud. si padece de hepatitis?**

Marcar con una X el que corresponda

|    |  |
|----|--|
| SI |  |
| NO |  |

**6.3.2. ¿El paciente está vacunado por el hepatitis?**

Marcar con una X el que corresponda

|    |  |
|----|--|
| SI |  |
| NO |  |

Si la respuesta es si, por favor precisar si es posible hepatitis A o B:

**6.3.3. Si la respuesta es sí, precisar la fecha (año) de vacunación:**

|  |
|--|
|  |
|--|

**6.4.1. Familiares con antecedentes de cáncer (puede marcar más de uno):**

Marcar con una X el que corresponda

**S: SI    N: NO    ?: Desconoce**

|                                      |          |          |          |
|--------------------------------------|----------|----------|----------|
| Esposa/esposo                        | <b>S</b> | <b>N</b> | <b>?</b> |
| Padre                                | <b>S</b> | <b>N</b> | <b>?</b> |
| Madre                                | <b>S</b> | <b>N</b> | <b>?</b> |
| Hermano                              | <b>S</b> | <b>N</b> | <b>?</b> |
| Hermana                              | <b>S</b> | <b>N</b> | <b>?</b> |
| Abuelo paternal                      | <b>S</b> | <b>N</b> | <b>?</b> |
| Abuela paternal                      | <b>S</b> | <b>N</b> | <b>?</b> |
| Abuelo maternal                      | <b>S</b> | <b>N</b> | <b>?</b> |
| Abuela maternal                      | <b>S</b> | <b>N</b> | <b>?</b> |
| Tíos/Tías paternal                   | <b>S</b> | <b>N</b> | <b>?</b> |
| Primos/Primas paternal               | <b>S</b> | <b>N</b> | <b>?</b> |
| Tíos/Tías maternal                   | <b>S</b> | <b>N</b> | <b>?</b> |
| Primos/Primas maternal               | <b>S</b> | <b>N</b> | <b>?</b> |
| Antecedentes familiares no conocidos |          |          |          |
| Otro                                 |          |          |          |

Si otro, precisar:

**6.4.2. Si la respuesta es sí, precisar si posible el tipo de cáncer y la fecha (año):**

| Persona | Tipo de cáncer | Año |
|---------|----------------|-----|
|         |                |     |
|         |                |     |

**1.1.3 Hora de fin de entrevista:**
